# Supplementary material
Source: publisher figshare collection journal article supplement (https://tandf.figshare.com/articles/dataset/_/6392447)
Supplement: Supplementary file 1 [file 3]

Journal of Vertebrate Paleontology  
SUPPLEMENTARY DATA 2

Two new macraucheniids (Mammalia: Litopterna) from the late middle Miocene  
(Laventan SALMA) of Quebrada Honda, Bolivia

ANDREW J. MCGRATH,<sup>\*,1</sup> FEDERICO ANAYA,<sup>2</sup> and DARIN A. CROFT<sup>3</sup>

<sup>1</sup>Department of Earth Science, University of California, Santa Barbara, California 93106,  
U.S.A., [amcgrath@umail.ucsb.edu](mailto:amcgrath@umail.ucsb.edu);

<sup>2</sup>Facultad de Ingeniería Geológica, Universidad Autónoma Tomás Frías, Av. del  
Maestro s/n, Potosí, Bolivia, [fedanaya@hotmail.com](mailto:fedanaya@hotmail.com);

<sup>3</sup>Department of Anatomy, Case Western Reserve University, 10900 Euclid Ave.,  
Cleveland, Ohio 44106–4930, U.S.A., [dcroft@case.edu](mailto:dcroft@case.edu).

\*Corresponding author

TABLE S1. Macraucheniid specimens and sources of comparative data used in this study.

**Institutional Abbreviations**—**AMNH FM**, American Museum of Natural History, New York, USA; **FMNH P**, Field Museum of Natural History, Chicago, USA; **IGM**, Museo Geológico Nacional, Servicio Geológico Colombiano (formerly INGEOMINAS), Bogotá D.C., Colombia; **MACN**, Museo Argentino de Ciencias Naturales ‘Bernardino Rivadavia,’ Buenos Aires, Argentina (A, Ameghino; PV, Vertebrate Paleontology); **MLP**, Museo de La Plata, La Plata, Argentina; **UATF-V**, Vertebrate Paleontology Collections, Universidad Autónoma Tomás Frías, Potosí, Bolivia; **UCMP**, University of California Museum of Paleontology, Berkeley, USA; **YPM-VPPU**, Yale Peabody Museum, Vertebrate Paleontology, Princeton University Collection, New Haven, Connecticut, USA.

| <b>Taxon</b>                       | <b>Specimen(s)</b>                                                | <b>References</b>          |
|------------------------------------|-------------------------------------------------------------------|----------------------------|
| <i>Coniopternium andinum</i>       | AMNH FM 109621, AMNH FM 109622, FMNH P 14660,                     | —                          |
| <i>Coniopternium primitivum</i>    | YPM VPPU 23523, YPM VPPU 23524, YPM VPPU 23526                    | —                          |
| <i>Cramauchenia normalis</i>       | AMNH FM 29726, MACN 52 219, MACN 52 220, MACN 52 224, MACN 52 225 | —                          |
| <i>Cullinia levis</i>              | MACN PV 4087, MLP 28-X-11-42, MLP 55-IV-28-64                     | —                          |
| <i>Huayqueriana cristata</i>       | MLP 37-III-7-2                                                    | Forasiepi et al., 2016     |
| <i>Huayqueriana cf. cristata</i>   | —                                                                 | Forasiepi et al., 2016     |
| <i>Llullataruca shockeyi</i>       | UATF-V-001242, UATF-V-001590, UATF-V-001904, UATF-V-002818        | —                          |
| <i>Llullataruca cf. shockeyi</i>   | MNHN BLV 23                                                       | Croft et al., 2009         |
| <i>Oxydontherium zeballosi</i>     | MACN PV, 3287, MACN PV 4441                                       | Forasiepi et al., 2016     |
| <i>Paranauchenia denticulata</i>   | MACN PV 12263, MACN PV 13177, MLP 81-XI-29-7                      | Schmidt and Ferrero, 2014  |
| <i>Paranauchenia hystata</i>       | MLP 29-IX-1-75                                                    | Schmidt and Ferrero, 2014  |
| <i>Promacrauchenia antiquua</i>    | MACN PV 7986                                                      | Forasiepi et al., 2016     |
| <i>Polymorphis lechei</i>          | AMNH FM 29480, MLP 12-2168                                        | —                          |
| <i>Pternoconius bondi</i>          | —                                                                 | Cheme-Arriaga et al., 2016 |
| <i>Pternoconius polymorphoides</i> | AMNH FM 109619                                                    | Cheme-Arriaga et al., 2016 |
| <i>Scalabrinitherium bravardi</i>  | MACN A 1270, MACN PV 4430, MACN PV 8903, MLP M-139, MLP M-143     | —                          |
| <i>‘Theosodon’ arozquetai</i>      | UATF-V-001162, UATF-V-001940                                      | —                          |
| <i>Theosodon frenguelli</i>        | MLP 52-IX-30-63, MLP 61-IV-16-1                                   | —                          |

|                             |                                                                                          |                                                      |
|-----------------------------|------------------------------------------------------------------------------------------|------------------------------------------------------|
| <i>Theosodon garretorum</i> | FMNH P 13175, YPM VPPU 15164                                                             | Scott, 1910                                          |
| <i>Theosodon gracilis</i>   | AMNH FM 9145, MACN A 2496-514, MLP 12-317                                                | Scott, 1910                                          |
| <i>Theosodon lallemanti</i> | FMNH P 13178, FMNH P 13179, FMNH P 13187, YPM VPPU 15216, YPM VPPU 15359, YPM VPPU 16003 | Scott, 1910                                          |
| <i>Theosodon lydekkeri</i>  | MACN A 9269-88, MLP 12-421, YPM VPPU 15717                                               |                                                      |
| <i>Theosodon</i> sp.        | FMNH P 13221, IGM 184407, IGM 250458, MUSM 1508, UCMP 38088, UCMP 39884                  | Cifelli and Guerrero, 1997; Tejada-Lara et al., 2015 |

## REFERENCES

- Cheme-Arriaga, L., M. T. Dozo, and J. N. Gelfo. 2016. A new Cramaucheniinae (Litopterna, Macraucheniidae) from the early Miocene of Patagonia, Argentina. *Journal of Vertebrate Paleontology* 4634:e1229672.
- Cifelli, R. L., and J. Guerrero. 1997. Litopterns; pp. 289–302 in R. F. Kay, R. H. Madden, R. L. Cifellii, and J. J. Flynn (eds.), *Vertebrate Paleontology in the Neotropics: The Miocene Fauna of La Venta, Colombia*. Smithsonian Institution Press, Washington, D.C., USA.
- Croft, D. A., F. Anaya, D. Auerbach, C. Garzione, and B. J. MacFadden. 2009. New data on Miocene Neotropical provinciality from Cerdas, Bolivia. *Journal of Mammalian Evolution* 16:175–198.
- Forasiepi, A. M., R. D. E. MacPhee, S. H. Pino, G. I. Schmidt, E. Amson, and C. Grohé. 2016. Exceptional skull of *Huayqueriana* (Mammalia, Litopterna, Macraucheniidae) from the late Miocene of Argentina: anatomy, systematics, and paleobiological

implications. Bulletin of the American Museum of Natural History 1–76.

Schmidt, G. I., and B. S. Ferrero. 2014. Taxonomic reinterpretation of *Theosodon hystatus* Cabrera and Kraglievich, 1931 (Litopterna, Macraucheniidae) and phylogenetic relationships of the family. Journal of Vertebrate Paleontology 34:1231–1238.

Scott, W. B. 1910. Mammalia of the Santa Cruz beds. Part I. Litopterna. Princeton University Expedition to Patagonia 7:1–156.

Tejada-Lara, J. V., R. Salas-Gismondi, F. Pujos, P. Baby, M. Benammi, S. Brusset, D. De Franceschi, N. Espurt, M. Urbina, and P.-O. Antoine. 2015. Life in proto-Amazonia: middle Miocene mammals from the Fitzcarrald Arch (Peruvian Amazonia). Palaeontology 58:341–378.
