# Supplementary material
Source: publisher figshare collection journal article supplement (https://tandf.figshare.com/articles/dataset/_/6392447)
Supplement: Supplementary file 2 [file 3]

Journal of Vertebrate Paleontology  
SUPPLEMENTARY DATA 4

Two new macraucheniids (Mammalia: Litopterna) from the late middle Miocene  
(Laventan SALMA) of Quebrada Honda, Bolivia

ANDREW J. MCGRATH,<sup>\*,1</sup> FEDERICO ANAYA,<sup>2</sup> and DARIN A. CROFT<sup>3</sup>

<sup>1</sup>Department of Earth Science, University of California, Santa Barbara, California 93106,  
U.S.A., [amcgrath@umail.ucsb.edu](mailto:amcgrath@umail.ucsb.edu);

<sup>2</sup>Facultad de Ingeniería Geológica, Universidad Autónoma Tomás Frías, Av. del  
Maestro s/n, Potosí, Bolivia, [fedanaya@hotmail.com](mailto:fedanaya@hotmail.com);

<sup>3</sup>Department of Anatomy, Case Western Reserve University, 10900 Euclid Ave.,  
Cleveland, Ohio 44106–4930, U.S.A., [dcroft@case.edu](mailto:dcroft@case.edu).

\*Corresponding author

TABLE S3. Non-dental measurements used in linear regression equations to estimate body mass in Table 2. Sources for regression equations: \*—Damuth (1990); †—Janis (1990); ‡—Scott (1990). See Table 2 for abbreviations. Abbreviations in parentheses are the terms used by the original sources. All measurements reported in cm.

| Measurement Proxy      | <i>'T.' arozquetai</i><br>(UATF-V-001940) | <i>L. shockeyi</i><br>(UATF-V-001904) | <i>T. garretorum</i><br>(Scott, 1910) |
|------------------------|-------------------------------------------|---------------------------------------|---------------------------------------|
| TJL <sup>†</sup>       | —                                         | 15.058                                | 23.95                                 |
| PJL <sup>†</sup>       | —                                         | 5.932                                 | 7.0                                   |
| WMA <sup>†</sup>       | —                                         | 7.121                                 | 10.2                                  |
| OCH <sup>†</sup>       | 6.438                                     | —                                     | 7.0                                   |
| PSL <sup>†</sup>       | 11.727                                    | —                                     | 14.4                                  |
| FLH (F1) <sup>‡</sup>  | —                                         | 24.32                                 | 30.78                                 |
| FTW (F4) <sup>‡</sup>  | 3.607                                     | 2.696                                 | 3.8                                   |
| FCW (F5) <sup>‡</sup>  | 7.062                                     | 5.161                                 | 8.1                                   |
| FTD (F6) <sup>‡</sup>  | —                                         | 2.273                                 | —                                     |
| FAPD (F7) <sup>‡</sup> | —                                         | 2.575                                 | —                                     |
| HLH (H1) <sup>‡</sup>  | —                                         | 15.95                                 | 21.82                                 |
| HL (H2) <sup>‡</sup>   | —                                         | 17.86                                 | 24.12                                 |
| HHW (H3) <sup>‡</sup>  | —                                         | 3.70                                  | 6.70                                  |
| HCW (H4) <sup>‡</sup>  | —                                         | 3.12                                  | 5.25                                  |
| HTD (H7) <sup>‡</sup>  | —                                         | 2.725                                 | —                                     |
| HAPD (H8) <sup>‡</sup> | —                                         | 2.327                                 | —                                     |
| OL (U2) <sup>‡</sup>   | —                                         | 5.49                                  | 8.2                                   |
| THW (T2) <sup>‡</sup>  | 6.985                                     | —                                     | 8.1                                   |

## REFERENCES

Damuth, J. 1990. Problems in estimating body masses of archaic ungulates using dental measurements; pp. 229–253 in J. Damuth and B. J. MacFadden (eds.), *Body Size in Mammalian Paleobiology: Estimation and Biological Implications*. Cambridge University Press, Cambridge, UK.

Janis, C. M. 1990. Correlation of cranial and dental variables with body size in ungulates and macropodoids; pp. 255–299 in J. Damuth and B. J. MacFadden (eds.), *Body Size in Mammalian Paleobiology: Estimation and Biological Implications*. Cambridge University Press, Cambridge, UK.

Scott, K. M. 1990. Postcranial dimensions of ungulates as predictors of body mass; pp. 301–377 in J. Damuth and B. J. MacFadden (eds.), *Body Size in Mammalian Paleobiology: Estimation and Biological Implications*. Cambridge University Press, Cambridge, UK.
