# Supplementary material
Source: publisher figshare collection journal article supplement (https://tandf.figshare.com/articles/dataset/_/6392447)
Supplement: Supplementary file 3 [file 3]

Journal of Vertebrate Paleontology  
SUPPLEMENTARY DATA 1

Two new macraucheniids (Mammalia: Litopterna) from the late middle Miocene  
(Laventan SALMA) of Quebrada Honda, Bolivia

ANDREW J. MCGRATH,<sup>\*,1</sup> FEDERICO ANAYA,<sup>2</sup> and DARIN A. CROFT<sup>3</sup>

<sup>1</sup>Department of Earth Science, University of California, Santa Barbara, California 93106,  
U.S.A., [amcgrath@umail.ucsb.edu](mailto:amcgrath@umail.ucsb.edu);

<sup>2</sup>Facultad de Ingeniería Geológica, Universidad Autónoma Tomás Frías, Av. del  
Maestro s/n, Potosí, Bolivia, [fedanaya@hotmail.com](mailto:fedanaya@hotmail.com);

<sup>3</sup>Department of Anatomy, Case Western Reserve University, 10900 Euclid Ave.,  
Cleveland, Ohio 44106–4930, U.S.A., [dcroft@case.edu](mailto:dcroft@case.edu).

\*Corresponding author

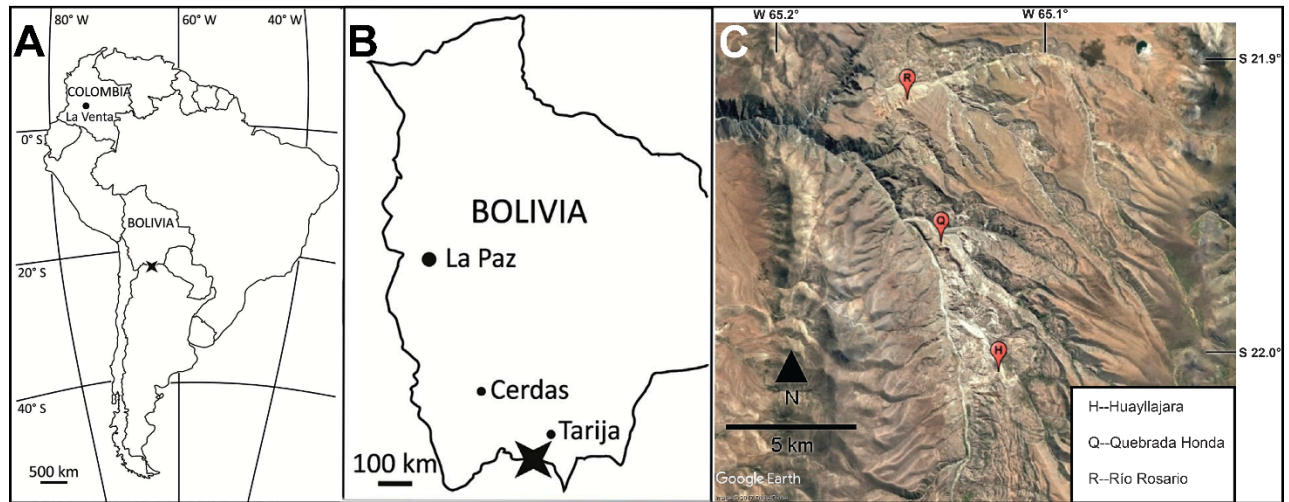

Figure S1. **A**, map showing the locations of Quebrada Honda (star) and La Venta in South America. **B**, map showing the locations of Quebrada Honda (star) and Cerdas in Bolivia. **C**, map of Quebrada Honda local area showing the locations of Huayllajara, Quebrada Honda, and Río Rosario. Modified from Catena et al. (2017).

## REFERENCES

Catena, A. M., D. I. Hembree, B. Z. Saylor, F. Anaya, and D. A. Croft. 2017. Paleosol and ichnofossil evidence for significant Neotropical habitat variation during the late middle Miocene (Serravallian). *Palaeogeography, Palaeoclimatology, Palaeoecology* 487:381–398.
