# Supplementary material
Source: publisher figshare collection journal article supplement (https://tandf.figshare.com/articles/dataset/_/6392447)
Supplement: Supplementary file 4 [file 3]

Journal of Vertebrate Paleontology  
SUPPLEMENTARY DATA 3

Two new macraucheniids (Mammalia: Litopterna) from the late middle Miocene  
(Laventan SALMA) of Quebrada Honda, Bolivia

ANDREW J. MCGRATH,<sup>\*,1</sup> FEDERICO ANAYA,<sup>2</sup> and DARIN A. CROFT<sup>3</sup>

<sup>1</sup>Department of Earth Science, University of California, Santa Barbara, California 93106,  
U.S.A., [amcgrath@umail.ucsb.edu](mailto:amcgrath@umail.ucsb.edu);

<sup>2</sup>Facultad de Ingeniería Geológica, Universidad Autónoma Tomás Frías, Av. del  
Maestro s/n, Potosí, Bolivia, [fedanaya@hotmail.com](mailto:fedanaya@hotmail.com);

<sup>3</sup>Department of Anatomy, Case Western Reserve University, 10900 Euclid Ave.,  
Cleveland, Ohio 44106–4930, U.S.A., [dcroft@case.edu](mailto:dcroft@case.edu).

\*Corresponding author

TABLE S2. List of characters and character states used in the phylogenetic analysis, from Forasiepi et al. (2016). All characters treated as unordered.

1. Development of nasals
  - 0 developed, overhanging the nasal aperture
  - 1 reduced
  - 2 vestigial or absent
2. Nasal aperture, caudal border
  - 0 anterior to orbit
  - 1 level with orbit
3. Anterior palatal shape
  - 0 lateral borders almost parallel
  - 1 narrowing at P2 or P3 level
4. Orbit, postorbital bar
  - 0 open (large gap)
  - 1 open (small gap)
  - 2 closed
5. Outline of premaxillary area in palatal view
  - 0 acute
  - 1 rounded
6. Premaxillary area in lateral view
  - 0 slightly ventrally curved
  - 1 straight
7. Frontal fossae on caudal margin of nasal aperture
  - 0 absent
  - 1 present
8. Height of tooth crown (HI: crown height/labiolingual width; Janis, 1988) based on m3 when possible
  - 0 brachyodont (HI < 1.45)
  - 1 mesodont (HI = or > 1.45)
9. Diastema between I3–C
  - 0 present
  - 1 absent
10. Parastyle on P3–P4
  - 0 labially projected
  - 1 level with mesostyle and metastyle

11. Concavities between lingual styles (parastyle-mesostyle- metastyle) on M1–M3
  - 0 shallow
  - 1 deep
12. Position of hypocone on M1–M2
  - 0 hypocone level with metacone
  - 1 hypocone near protocone, mesial to metacone
13. Position of hypocone vs protocone on M2
  - 0 hypocone labial to protocone
  - 1 hypocone lingual to protocone
14. Anterolingual cingulum (precingulum) on M1–M2
  - 0 noticeably more lingual than posterolingual cingulum
  - 1 slightly lingual or at same level as posterolingual cingulum
15. Hypolophulid on p4
  - 0 shorter than paralophid
  - 1 similar in length to paralophid
16. Entolophid on m1–m2
  - 0 present
  - 1 absent
17. Hypoconulid on m3
  - 0 expanded, forming a third lobe
  - 1 not expanded
18. Entoconid on m1–m2
  - 0 weak (does not reach lingual level of the metaconid)
  - 1 developed (reaches lingual level of metaconid)
  - 2 absent
19. Paralophid on m1–m2
  - 0 level with or lingual to lingual border of metaconid
  - 1 labial to lingual border of metaconid
20. Entoconid on m3
  - 0 developed and joined to hypolophid
  - 1 incipient on the hypolophid
  - 2 joined to hypolophulid
  - 3 absent
21. Metaconid on m2
  - 0 labial or level with paraconid and entoconid/ hypoconulid
  - 1 projects lingual to level of paraconid and entoconid/hypoconulid

22. Implantation of c–p2  
0 oblique  
1 parallel to mandibular border
23. Trigonid valley on p4  
0 larger than talonid valley  
1 similar in size to talonid valley
24. Entoconid on p4  
0 present  
1 absent
25. Length of m2  
0 small (5–20 mm)  
1 medium (21–35 mm)  
2 large (36–45 mm)  
3 very large (more than 45 mm)
26. Position of coronal plane passing through infraorbital foramen  
0 anterior to M1  
1 anterior to M2  
2 anterior to M3  
3 over M3
27. Snout in dorsal view  
0 premaxillae and maxillae separated sagittally  
1 premaxillae sutured sagittally  
2 premaxillae and maxillae sutured sagittally
28. Choana, rostral border ( = posterior border of palate)  
0 level with or anterior to posterior border of M2  
1 posterior to M2
29. Orbit, coronal plane passing through rostral border  
0 anterior to posterior border of M3  
1 level with posterior border of M3  
2 considerably posterior to M3 (equivalent to one tooth-length gap)
30. Sagittal crest  
0 present  
1 absent
31. Basioccipital, median crest  
0 absent or vestigial  
1 present

32. Skull shape  
0 short and wide  
1 long and narrow
33. Occipital condyles  
0 protruding at level of nuchal crest in lateral view  
1 not protruding at level of nuchal crest in lateral view
34. Odontoid notch  
0 U-shaped  
1 V-shaped

## REFERENCES

- Forasiepi, A. M., R. D. E. MacPhee, S. H. Pino, G. I. Schmidt, E. Amson, and C. Grohé.  
2016. Exceptional skull of *Huayqueriana* (Mammalia, Litopterna, Macraucheniidae) from the late Miocene of Argentina: anatomy, systematics, and paleobiological implications. *Bulletin of the American Museum of Natural History* 1–76.
- Janis, C.M. 1988. An estimation of tooth volume and hypsodonty indices in ungulate mammals, and the correlation of these factors with dietary preferences. In D.E. Russell, J.-P. Santoro and D. Sigogneau-Russell (eds.), *Teeth revisited: Proceedings of the VIIth International Symposium on Dental Morphology*, Paris, 1986: 367–387. Paris: Mémoires du Muséum National d'Histoire Naturelle, series C.
