# Supplementary material
Source: publisher figshare collection journal article supplement (https://tandf.figshare.com/articles/dataset/_/6392447)
Supplement: Supplementary file 5 [file 3]

Journal of Vertebrate Paleontology  
SUPPLEMENTARY DATA 6

Two new macraucheniids (Mammalia: Litopterna) from the late middle Miocene  
(Laventan SALMA) of Quebrada Honda, Bolivia

ANDREW J. MCGRATH,<sup>\*,1</sup> FEDERICO ANAYA,<sup>2</sup> and DARIN A. CROFT<sup>3</sup>

<sup>1</sup>Department of Earth Science, University of California, Santa Barbara, California 93106,  
U.S.A., [amcgrath@umail.ucsb.edu](mailto:amcgrath@umail.ucsb.edu);

<sup>2</sup>Facultad de Ingeniería Geológica, Universidad Autónoma Tomás Frías, Av. del  
Maestro s/n, Potosí, Bolivia, [fedanaya@hotmail.com](mailto:fedanaya@hotmail.com);

<sup>3</sup>Department of Anatomy, Case Western Reserve University, 10900 Euclid Ave.,  
Cleveland, Ohio 44106–4930, U.S.A., [dcroft@case.edu](mailto:dcroft@case.edu).

\*Corresponding author

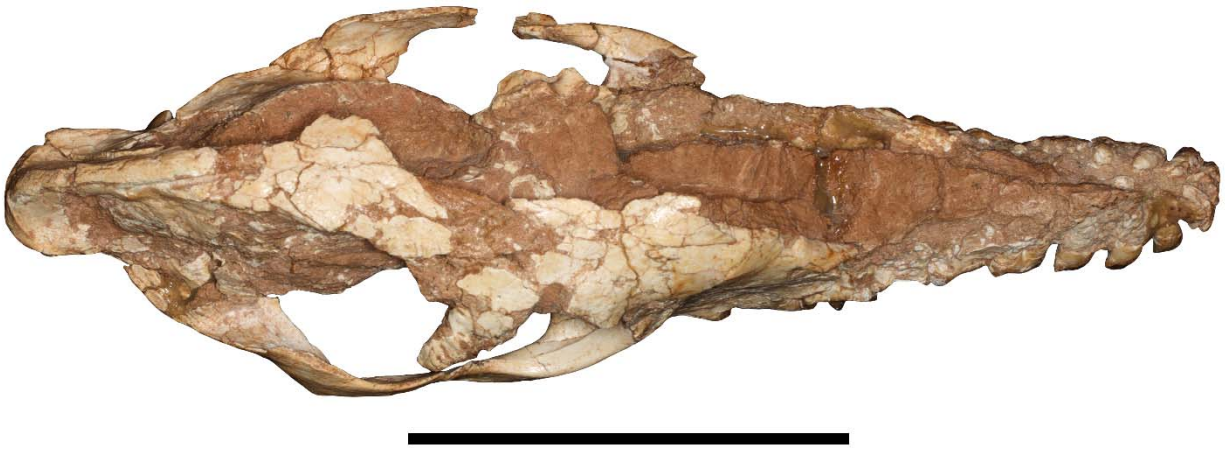

Figure S2. Holotype cranium of '*T.* *arozquetai*' (UATF-V-001940) in dorsal view. Scale bar equals 10 cm.
