# Supplementary material
Source: publisher figshare collection journal article supplement (https://tandf.figshare.com/articles/dataset/_/6392447)
Supplement: Supplementary file 6 [file 3]

Journal of Vertebrate Paleontology  
SUPPLEMENTARY DATA 5

Two new macraucheniids (Mammalia: Litopterna) from the late middle Miocene  
(Laventan SALMA) of Quebrada Honda, Bolivia

ANDREW J. MCGRATH,<sup>\*,1</sup> FEDERICO ANAYA,<sup>2</sup> and DARIN A. CROFT<sup>3</sup>

<sup>1</sup>Department of Earth Science, University of California, Santa Barbara, California 93106,  
U.S.A., [amcgrath@umail.ucsb.edu](mailto:amcgrath@umail.ucsb.edu);

<sup>2</sup>Facultad de Ingeniería Geológica, Universidad Autónoma Tomás Frías, Av. del  
Maestro s/n, Potosí, Bolivia, [fedanaya@hotmail.com](mailto:fedanaya@hotmail.com);

<sup>3</sup>Department of Anatomy, Case Western Reserve University, 10900 Euclid Ave.,  
Cleveland, Ohio 44106–4930, U.S.A., [dcroft@case.edu](mailto:dcroft@case.edu).

\*Corresponding author

TABLE S4. Linear regression equations used to estimate body mass. All equations take the form of  $\log(\text{Mass}) = A * \log(\text{Measurement}) + B$ . \*—Damuth (1990); †—Janis (1990); ‡—Scott (1990). The Measurement Proxy column lists the abbreviation for the measurement used by the original source. For Damuth (1990), ‘non-selenodont’ equations were used, measurements are in mm, and masses are in g. For Janis (1990) and Scott (1990), the ‘all ungulates’ equations were used, measurements are in cm, and masses are in kg.

| Measurement Proxy | A      | B       |
|-------------------|--------|---------|
| P3L*              | 2.93   | 1.43    |
| M1L*              | 3.11   | 1.11    |
| M1W*              | 2.86   | 1.30    |
| M2L*              | 2.96   | 1.09    |
| M2W*              | 2.90   | 1.14    |
| UPCRL*            | 3.13   | -1.45   |
| p4L*              | 3.11   | 1.15    |
| m1L*              | 3.17   | 1.04    |
| m2L*              | 2.98   | 1.11    |
| p4–m2L*           | 3.12   | -0.43   |
| m1–3L*            | 3.03   | -0.39   |
| LPCRL*            | 3.17   | -1.47   |
| TJL†              | 2.884  | -1.952  |
| PJL†              | 2.412  | -0.031  |
| WMA†              | 2.803  | -0.352  |
| OCH†              | 2.873  | -0.457  |
| PSL†              | 2.758  | -0.973  |
| FLH (F1)‡         | 3.4855 | -2.9112 |
| FTW (F4)‡         | 3.0284 | 0.7196  |
| FCW (F5)‡         | 2.7820 | -0.0107 |
| FTD (F6)‡         | 2.8210 | 0.9062  |
| FAPD (F7)‡        | 2.6016 | 0.9119  |
| HLH (H1)‡         | 3.4026 | -2.3707 |
| HL (H2)‡          | 3.3951 | -2.5130 |
| HHW (H3)‡         | 2.7146 | 0.2594  |
| HCW (H4)‡         | 2.4815 | 0.4516  |
| HTD (H7)‡         | 2.4850 | 1.0934  |
| HAPD (H8)‡        | 2.4937 | 0.8760  |

TABLE 3S. (Continued)

|                       |        |         |
|-----------------------|--------|---------|
| OL (U2) <sup>‡</sup>  | 2.7611 | -0.1556 |
| THW (T2) <sup>‡</sup> | 2.8491 | -0.2495 |

## REFERENCES

- Damuth, J. 1990. Problems in estimating body masses of archaic ungulates using dental measurements; pp. 229–253 in J. Damuth and B. J. MacFadden (eds.), *Body Size in Mammalian Paleobiology: Estimation and Biological Implications*. Cambridge University Press, Cambridge, UK.
- Janis, C. M. 1990. Correlation of cranial and dental variables with body size in ungulates and macropodoids; pp. 255–299 in J. Damuth and B. J. MacFadden (eds.), *Body Size in Mammalian Paleobiology: Estimation and Biological Implications*. Cambridge University Press, Cambridge, UK.
- Scott, K. M. 1990. Postcranial dimensions of ungulates as predictors of body mass; pp. 301–377 in J. Damuth and B. J. MacFadden (eds.), *Body Size in Mammalian Paleobiology: Estimation and Biological Implications*. Cambridge University Press, Cambridge, UK.
